# Supplementary material
Source: PubMed Central journal article supplement (PMC4408906)

**A**

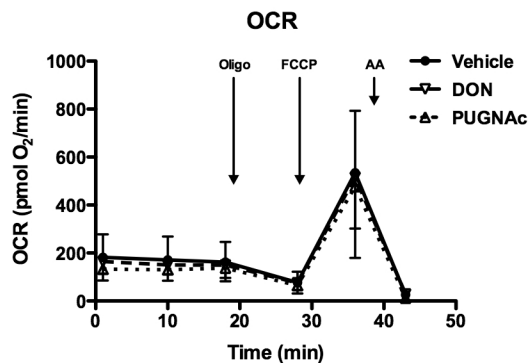

**B**

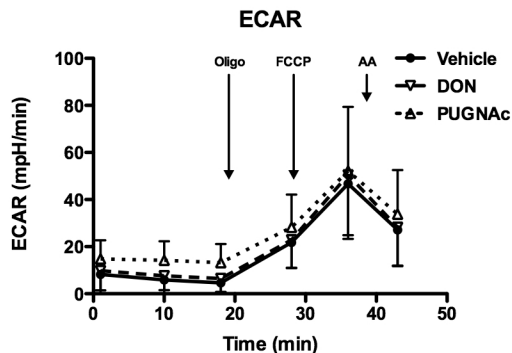

**C**

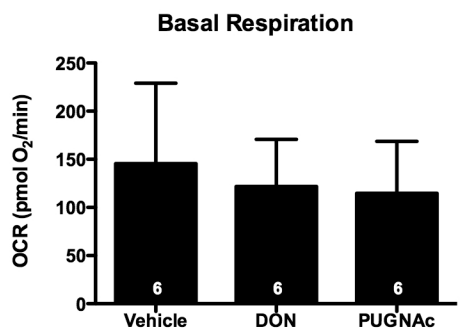

**D**

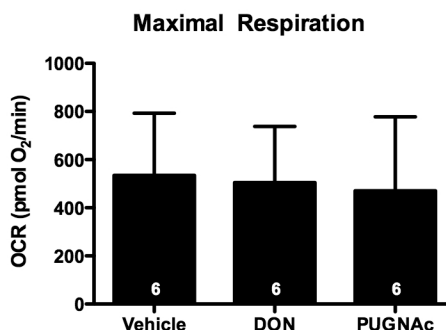

**E**

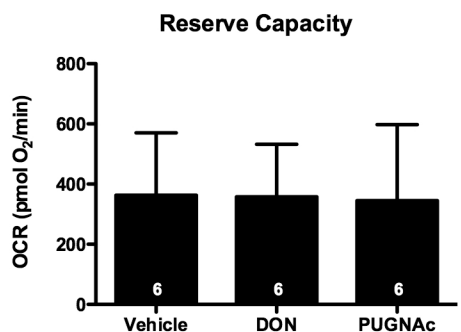

**F**

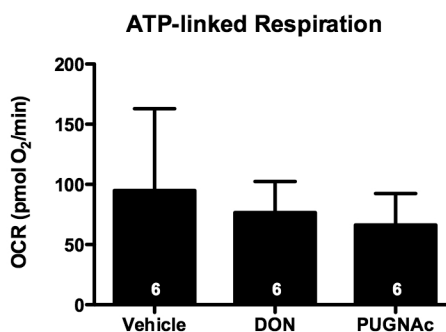

**G**

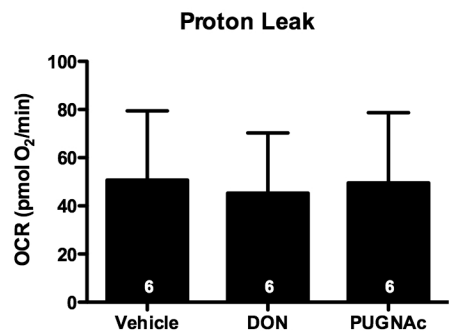

**H**

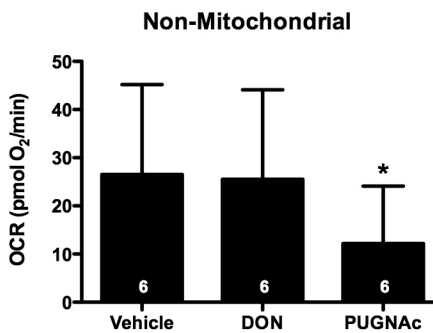

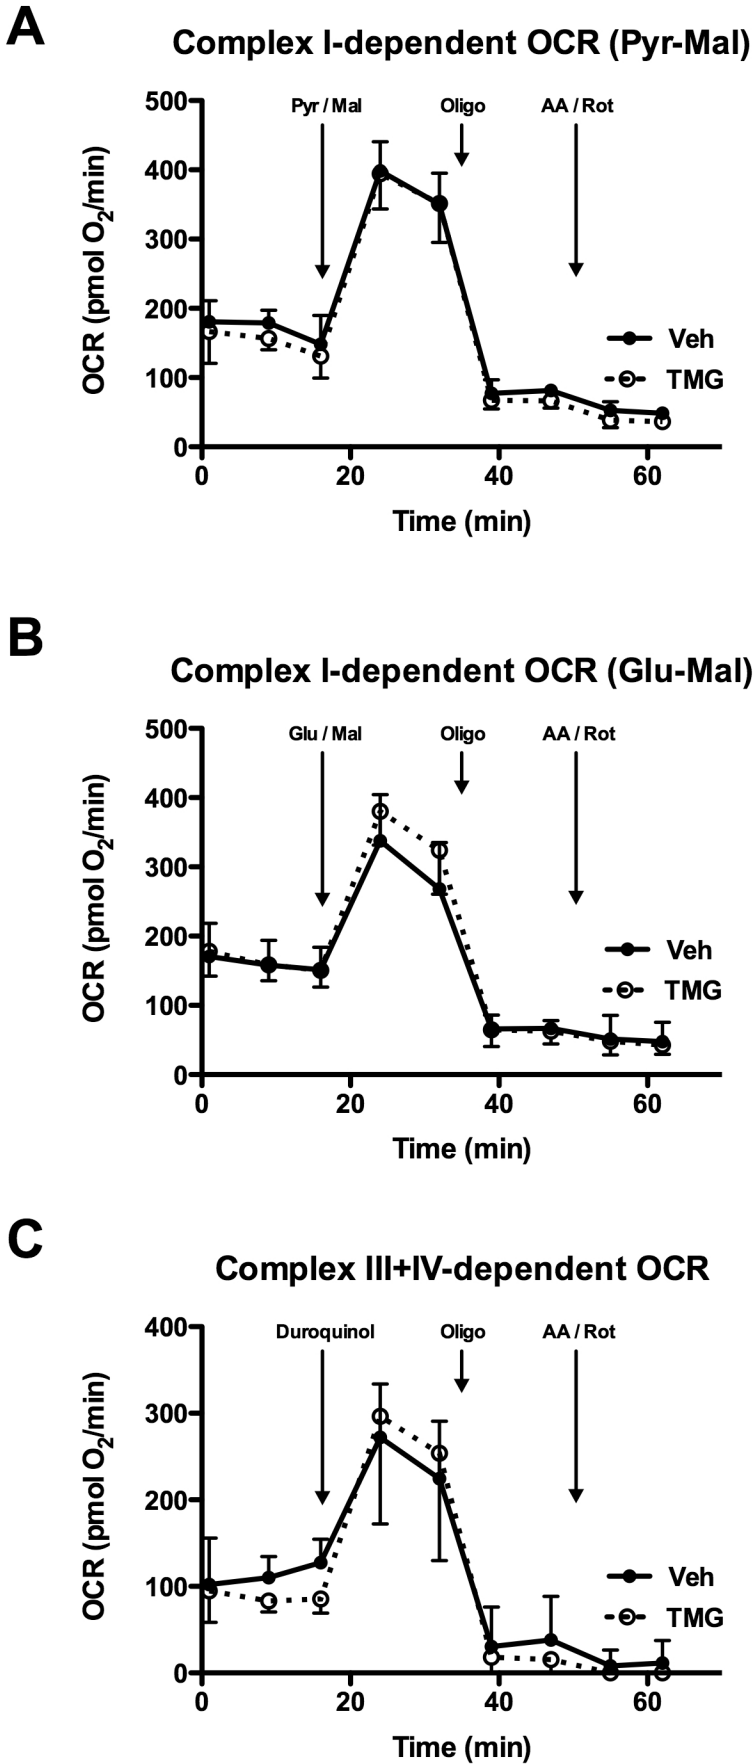

Supplement: NIHMS678079-supplement-01.pdf [file NIHMS678079-supplement-01.pdf]
